# Supplementary material for: Analysing planktonic foraminiferal growth in three dimensions with foram3D: an R package for automated trait measurements from CT scans
Source: Copernicus journal article supplement (doi:10.5194/jm-41-149-2022), 2022-11-01
Supplement: Supplementary file 1 [file jm-41-149-2022-supplement.zip]

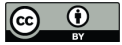

*Supplement of*

**Analysing planktonic foraminiferal growth in three dimensions  
with foram3D: an R package for automated trait measurements  
from CT scans**

**Anieke Brombacher et al.**

*Correspondence to:* Anieke Brombacher ([anieke.brombacher@soton.ac.uk](mailto:anieke.brombacher@soton.ac.uk))

- [jm-41-149-2022-supplement-title-page.pdf](#)
- [Supplementary Code.R](#)

The copyright of individual parts of the supplement might differ from the article licence.
